# Supplementary material for: Rapid Activation of Transforming Growth Factor β–Activated Kinase 1 in Chondrocytes by Phosphorylation and K63‐Linked Polyubiquitination Upon Injury to Animal Articular Cartilage
Source: PubMed Central journal article supplement (PMC5347887; doi:10.1002/art.39965), 2017-02-27
Supplement: ART-69-565-s001.pdf [file ART-69-565-s001.pdf]

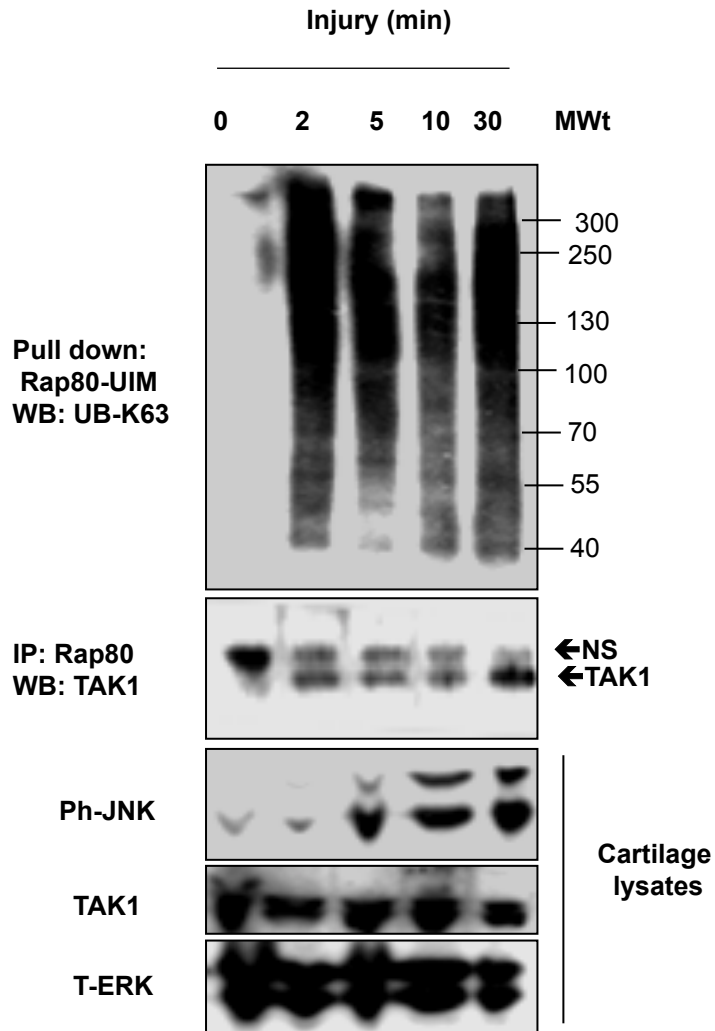

**Supplementary Figure 1: TAK1 is identified in Rap80- UIM pull down in response to cartilage injury.** Cartilage was dissected and either snap frozen (0 min) or cultured for the indicated time points. K63-ubiquitin linked proteins were pulled down from cartilage lysates by Rap80 UIM as described in Methods and proteins bound to the beads were western blotted with an anti- K-63 ubiquitin antibody and anti-TAK1 antibody. Lysates were western blotted for ph-JNK and ERK.
